# Supplementary material for: Ex-ante Benefit-Cost Analysis of the Elimination of a Glossina palpalis gambiensis Population in the Niayes of Senegal
Source: PLoS Negl Trop Dis. 2014 Aug 21;8(8):e3112. doi: 10.1371/journal.pntd.0003112 (PMC4140673; doi:10.1371/journal.pntd.0003112)
Supplement: Supporting Information S1 — Data used in the socio-economic analysis. (XLSX) [file pntd.0003112.s001.xlsx]

## Sheet: data
farm_id	Nb_Producing_females	Milk_production	Weight_cattle_sold	Nb_cattle_sold	Price_cattle_sold(FCFA)	Nb_cattle	longitude	latitude	Total_sales	Transhumance	Herder	Crop_surf_ha	Ng_goats	Nb_sheep	Nb_donkeys	Nb_horses	Nb_gobra	Nb_djakore	Nb_exotique	Grazing_area_ha	Nb_herders	Plough	Artificial_insemin	cornadis	Sprayer	Cart	Tsetse_status_Maxent	Farming_system	Cattle_sales_per_head
2	45	4810	80	15	170000	78	265896	1624824	7398.76	TRUE	famille	2	50	0	2	0	0	78	0	0	2	FALSE	FALSE	FALSE	FALSE	TRUE	free	diakore	94.8558
4	38	1844.21	110	7	160000	64	264593	1621008	3053.71	FALSE	famille	2	15	0	0	0	0	64	0	0	1	FALSE	TRUE	FALSE	FALSE	FALSE	free	diakore	47.7141
5	43	4325.12	140	2	200000	81	264560	1621126	3767.13	FALSE	famille	5	97	4	2	0	0	81	0	0	2	TRUE	FALSE	FALSE	TRUE	TRUE	free	diakore	46.5078
7	28	3175.71	90	7	155000	45	269737	1620865	3972.35	FALSE	famille	4	77	0	2	0	0	44	1	0	0	TRUE	TRUE	FALSE	TRUE	TRUE	free	diakore	88.2744
8	19	1719.42	167	6	185000	36	270294	1629573	2947.36	TRUE	famille	0	39	5	1	0	0	34	2	0	3	FALSE	TRUE	FALSE	FALSE	TRUE	free	diakore	81.8712
9	7	945	95	1	145000	13	268402	1633589	910.901	FALSE	famille	2	0	0	1	0	0	13	0	0	1	TRUE	TRUE	FALSE	TRUE	TRUE	tsetse	diakore	70.0693
10	16	1946.25	110	0	175000	29	265354	1630643	1420.76	TRUE	famille	2.5	9	0	3	0	0	29	0	0	0	FALSE	TRUE	FALSE	FALSE	TRUE	tsetse	diakore	48.9918
11	41	2400	0	0	0	72	264008	1628995	1752	FALSE	famille	0	10	0	1	0	0	70	2	0	3	FALSE	TRUE	FALSE	FALSE	TRUE	free	diakore	24.3333
12	10	796	170	10	250000	25	268648	1628434	4392.31	FALSE	employes	0	4	32	0	1	0	0	25	2	3	TRUE	TRUE	TRUE	TRUE	TRUE	free	other	175.692
13	32	2873.75	159	11	165000	59	266743	1627958	4864.79	TRUE	famille	0	54	0	2	1	0	59	0	0	2	FALSE	TRUE	FALSE	TRUE	TRUE	free	diakore	82.4541
14	16	1640.44	170	5	160000	37	265532	1629251	2417.11	TRUE	famille	1	0	0	3	0	0	35	2	0	2	TRUE	TRUE	FALSE	TRUE	TRUE	tsetse	diakore	65.3274
15	9	550	180	3	210000	19	267261	1627751	1361.93	FALSE	famille	0.5	15	0	2	1	0	17	2	0	2	FALSE	TRUE	FALSE	TRUE	TRUE	free	diakore	71.6805
16	21	3095.24	90	2	110000	42	270141	1621289	2594.91	FALSE	famille	3	21	3	2	0	0	42	0	0	1	TRUE	TRUE	FALSE	TRUE	TRUE	free	diakore	61.7836
17	34	1715.29	120	2	195000	62	267080	1624700	1846.72	FALSE	famille	4	40	0	2	0	0	57	5	4	2	TRUE	TRUE	FALSE	TRUE	TRUE	free	diakore	29.7858
18	46	0	180	8	250000	90	267990	1634084	3048.98	FALSE	famille	7	53	3	2	1	0	89	1	0	2	FALSE	TRUE	FALSE	TRUE	TRUE	tsetse	diakore	33.8776
19	5	1296	0	0	0	9	268084	1633727	946.08	FALSE	famille	1	0	0	1	0	0	9	0	0	1	FALSE	FALSE	FALSE	FALSE	TRUE	tsetse	diakore	105.12
20	17	1827.41	170	3	180000	34	270293	1629507	2157.24	TRUE	famille	0	0	0	1	0	0	0	34	0	3	FALSE	TRUE	FALSE	FALSE	TRUE	free	other	63.4481
21	17	1642.94	80	2	95000	29	269966	1621214	1489	FALSE	famille	8	54	0	0	0	0	29	0	0	2	FALSE	FALSE	FALSE	TRUE	TRUE	free	diakore	51.3448
22	16	1522.5	125	2	160000	29	269899	1621252	1599.26	FALSE	famille	10	20	0	4	0	0	0	29	0	1	TRUE	FALSE	FALSE	TRUE	TRUE	free	other	55.147
23	5	436	180	2	250000	10	268656	1633675	1080.53	FALSE	famille	3	15	0	1	0	0	10	0	0	2	TRUE	TRUE	FALSE	TRUE	TRUE	free	diakore	108.053
24	10	1194	170	5	240000	19	267925	1633818	2701.01	FALSE	famille	1	25	0	1	0	0	19	0	0	2	FALSE	TRUE	FALSE	TRUE	TRUE	tsetse	diakore	142.158
25	26	2398.2	125	6	170000	41	268109	1633795	3305.67	FALSE	famille	4	0	0	1	0	0	39	2	0	2	TRUE	TRUE	FALSE	TRUE	TRUE	tsetse	diakore	80.6261
26	33	1642.91	190	5	210000	49	265386	1630841	2800.04	FALSE	famille	1	19	0	2	0	0	49	0	0	2	FALSE	FALSE	FALSE	FALSE	TRUE	free	diakore	57.1437
27	41	25357.9	207	6	210000	59	268683	1628468	20432.1	FALSE	employes	6	5	41	0	13	0	22	37	5	13	TRUE	FALSE	TRUE	TRUE	TRUE	free	other	346.307
29	25	2352	110	7	160000	47	264297	1630830	3424.39	FALSE	employes	3	15	0	2	0	0	46	1	0	3	FALSE	TRUE	FALSE	TRUE	TRUE	tsetse	diakore	72.8594
30	14	1851.43	215	9	225000	30	267537	1625041	4438.64	FALSE	famille	9.5	75	0	1	1	0	30	0	0	3	TRUE	FALSE	FALSE	TRUE	TRUE	free	diakore	147.955
31	13	1250.77	70	2	135000	22	268141	1633709	1324.67	FALSE	famille	4	22	0	1	0	0	22	0	0	2	TRUE	TRUE	FALSE	TRUE	TRUE	tsetse	diakore	60.2125
32	11	1150	125	4	170000	20	268631	1633603	1876.15	FALSE	famille	7	0	2	2	0	0	20	0	0	1	TRUE	TRUE	FALSE	TRUE	TRUE	free	diakore	93.8077
33	5	95	0	0	0	8	267019	1631591	69.35	FALSE	famille	2	10	0	1	0	0	8	0	0	1	TRUE	FALSE	FALSE	FALSE	TRUE	tsetse	diakore	8.66875
34	17	1047.53	170	0	275000	35	267095	1631563	764.697	FALSE	famille	1	15	0	2	0	0	35	0	0	0	TRUE	TRUE	FALSE	TRUE	TRUE	tsetse	diakore	21.8485
35	23	966	100	3	165000	41	263970	1628933	1459.8	TRUE	famille	3	5	0	1	0	0	39	2	0	2	FALSE	TRUE	FALSE	FALSE	TRUE	free	diakore	35.605
36	32	2703.75	90	6	115000	71	263059	1628075	3025.64	TRUE	famille	2	22	0	2	0	0	71	0	0	1	FALSE	TRUE	FALSE	FALSE	TRUE	free	diakore	42.6146
38	48	2620	120	5	155000	89	270103	1621186	3094.08	FALSE	famille	11	28	5	0	0	0	89	0	0	3	FALSE	FALSE	FALSE	TRUE	TRUE	free	diakore	34.765
39	65	5711.54	110	9	215000	147	263936	1628933	7119.32	TRUE	famille	2	58	0	2	0	0	147	0	0	2	FALSE	TRUE	FALSE	FALSE	TRUE	free	diakore	48.4307
40	39	3177.69	120	5	180000	99	263898	1628935	3691.76	FALSE	famille	3	59	5	1	0	0	98	1	0	3	FALSE	TRUE	FALSE	FALSE	TRUE	free	diakore	37.2905
41	92	14750.2	190	19	215000	198	266088	1624755	16995.2	FALSE	famille	7	92	0	2	0	0	198	0	0	2	TRUE	TRUE	FALSE	TRUE	TRUE	tsetse	diakore	85.8344
42	33	1171.97	215	5	450000	62	267027	1624672	4285.65	TRUE	employes	1.5	51	0	2	2	0	62	0	0	1	FALSE	TRUE	FALSE	FALSE	TRUE	free	diakore	69.1233
43	11	643.636	120	5	155000	22	266988	1631553	1651.34	FALSE	famille	1	2	0	2	0	0	22	0	0	2	TRUE	FALSE	FALSE	FALSE	TRUE	tsetse	diakore	75.0607
44	27	1978.67	120	7	180000	51	264625	1621160	3365.29	FALSE	famille	2	56	0	0	0	0	51	0	0	1	FALSE	FALSE	FALSE	TRUE	TRUE	free	diakore	65.986
46	30	4536	0	0	0	60	275472	1640423	3311.28	FALSE	famille	2	70	4	1	0	0	60	0	0	2	TRUE	FALSE	FALSE	FALSE	TRUE	free	diakore	55.188
48	13	5053.85	150	3	125000	30	277996	1634588	4260.99	FALSE	famille	0	25	0	0	3	0	30	0	0	1	FALSE	FALSE	FALSE	FALSE	TRUE	free	diakore	142.033
49	8	0	400	2	300000	17	287361	1635724	914.695	FALSE	famille	0	42	0	0	1	0	17	0	0	1	FALSE	FALSE	FALSE	FALSE	TRUE	free	diakore	53.8056
50	9	0	0	0	0	17	287634	1636095	0	FALSE	famille	0	14	0	0	0	0	17	0	0	1	FALSE	FALSE	FALSE	FALSE	FALSE	free	diakore	0
51	13	0	0	0	0	18	270004	1640431	0	FALSE	employes	0	7	0	1	1	0	4	14	0	0	FALSE	TRUE	FALSE	TRUE	TRUE	free	other	0
52	53	15680.4	175	3	200000	115	280868	1627832	12361.4	FALSE	famille	0.5	120	0	3	0	0	115	0	0	3	FALSE	FALSE	FALSE	FALSE	TRUE	free	diakore	107.49
53	21	5605.71	125	1	120000	37	277806	1632912	4275.11	FALSE	famille	0	11	0	1	0	0	37	0	0	2	FALSE	FALSE	FALSE	FALSE	TRUE	tsetse	diakore	115.544
54	30	4250	250	1	200000	66	270116	1635342	3407.4	FALSE	famille	3.5	10	0	2	0	0	66	0	0	4	TRUE	TRUE	FALSE	FALSE	TRUE	free	diakore	51.6272
55	17	1200	0	0	0	29	283133	1632663	876	TRUE	famille	1.5	15	3	1	0	29	0	0	0	4	FALSE	FALSE	FALSE	FALSE	TRUE	free	gobra	30.2069
56	34	6528.82	400	1	300000	66	275135	1638972	5223.39	FALSE	famille	2	31	0	1	0	0	66	0	0	5	FALSE	FALSE	FALSE	FALSE	TRUE	free	diakore	79.1423
57	48	5355	150	4	200000	91	281876	1642702	5128.74	TRUE	famille	0.5	40	0	8	0	0	90	1	0	5	FALSE	FALSE	FALSE	FALSE	TRUE	free	diakore	56.3598
58	53	9360	400	1	300000	112	280011	1637291	7290.15	TRUE	famille	0.5	40	0	1	1	0	112	0	0	5	FALSE	FALSE	FALSE	FALSE	TRUE	free	diakore	65.0906
59	39	21600	100	3	130000	106	281569	1627830	16362.6	FALSE	employes	0	50	0	1	0	0	106	0	0	1	FALSE	FALSE	FALSE	FALSE	TRUE	free	diakore	154.364
61	5	1200	0	0	0	12	282003	1642835	876	TRUE	famille	0.75	13	0	1	0	0	12	0	0	2	FALSE	FALSE	FALSE	FALSE	TRUE	free	diakore	73
62	15	1470	0	0	0	44	270228	1640991	1073.1	TRUE	employes	0	0	0	0	0	0	44	0	0	1	FALSE	FALSE	FALSE	FALSE	FALSE	free	diakore	24.3886
63	25	7099.2	250	1	200000	53	270434	1641145	5487.31	FALSE	famille	0	32	0	1	0	0	53	0	0	1	FALSE	FALSE	FALSE	FALSE	TRUE	free	diakore	103.534
64	6	360	0	0	0	14	270633	1647049	262.8	FALSE	famille	3	0	0	1	0	0	14	0	0	5	TRUE	FALSE	FALSE	TRUE	TRUE	tsetse	diakore	18.7714
65	78	21184.6	300	4	200000	174	280020	1637276	16684.4	FALSE	famille	2	150	0	1	0	0	174	0	0	4	TRUE	FALSE	FALSE	TRUE	TRUE	free	diakore	95.8871
66	45	17735.1	250	2	200000	95	279135	1632972	13556.4	FALSE	famille	3.5	40	0	12	1	0	95	0	0	6	TRUE	FALSE	FALSE	FALSE	TRUE	tsetse	diakore	142.699
67	27	7200	0	0	0	48	281993	1642829	5256	TRUE	famille	1	33	0	3	0	0	48	0	0	4	FALSE	FALSE	FALSE	FALSE	TRUE	free	diakore	109.5
68	9	3600	170	2	150000	20	281569	1627830	3085.35	TRUE	famille	0.5	75	0	0	0	0	20	0	0	1	FALSE	FALSE	FALSE	FALSE	FALSE	free	diakore	154.267
70	31	6621.77	650	4	900000	84	266020	1642272	10322.1	FALSE	famille	2.5	0	0	2	0	0	80	4	0	1	FALSE	TRUE	FALSE	FALSE	TRUE	free	diakore	122.882
71	11	4104.55	280	2	450000	29	266025	1642319	4368.36	FALSE	famille	1.5	0	0	2	0	0	29	0	0	0	FALSE	TRUE	FALSE	FALSE	TRUE	free	diakore	150.633
72	12	967.5	133	3	233333	32	259289	1631058	1773.42	TRUE	famille	1.5	0	0	1	0	0	32	0	0	2	FALSE	FALSE	FALSE	TRUE	TRUE	tsetse	diakore	55.4193
73	54	7760	170	10	300000	124	259287	1630804	10238.3	TRUE	famille	0	0	0	2	1	2	117	5	0	4	FALSE	TRUE	FALSE	TRUE	TRUE	tsetse	diakore	82.5668
74	21	1762.86	133	3	233333	48	266026	1642428	2354.03	FALSE	employes	4	0	0	0	1	0	45	3	0	1	FALSE	TRUE	FALSE	TRUE	TRUE	free	diakore	49.0423
76	2	0	0	0	0	14	262750	1636196	0	FALSE	famille	0	0	0	0	1	0	7	7	0	0	FALSE	TRUE	FALSE	FALSE	FALSE	tsetse	other	0
77	17	2334.71	125	2	200000	37	259287	1630839	2314.13	FALSE	famille	0	0	0	1	0	0	37	0	0	2	FALSE	TRUE	FALSE	TRUE	TRUE	tsetse	diakore	62.5441
78	11	883.636	150	2	250000	29	263111	1642023	1407.3	FALSE	famille	4	0	0	1	0	0	29	0	0	2	FALSE	FALSE	FALSE	TRUE	TRUE	free	diakore	48.5276
79	4	0	0	0	0	8	262750	1636207	0	FALSE	employes	2.5	0	0	1	0	0	5	3	0	1	FALSE	TRUE	FALSE	FALSE	TRUE	tsetse	other	0
80	8	911.25	150	2	225000	23	299289	1631012	1351.23	FALSE	famille	1	28	0	0	0	0	22	1	0	3	FALSE	TRUE	FALSE	TRUE	TRUE	free	diakore	58.7493
81	31	5852.9	150	6	208000	86	266025	1642206	6175.19	FALSE	famille	3	0	0	2	0	0	84	2	0	3	FALSE	TRUE	FALSE	TRUE	TRUE	free	diakore	71.8045
82	18	1893.33	140	5	200000	52	266026	1642380	2906.63	FALSE	employes	3	0	0	2	0	2	49	1	0	0	FALSE	TRUE	FALSE	TRUE	TRUE	free	diakore	55.8967
83	24	3400	130	5	220000	58	260187	1634146	4158.94	FALSE	employes	0	0	0	0	0	0	55	3	0	0	FALSE	TRUE	FALSE	TRUE	FALSE	free	diakore	71.7059
84	8	1170	150	1	250000	27	263114	1641776	1235.22	TRUE	famille	5	0	0	4	0	0	27	0	0	2	FALSE	FALSE	FALSE	TRUE	TRUE	free	diakore	45.749
87	5	2592	150	1	250000	17	258827	1640330	2273.28	TRUE	famille	3	25	0	1	0	0	17	0	0	2	FALSE	FALSE	FALSE	FALSE	TRUE	free	diakore	133.723
88	8	3645	250	2	450000	25	254837	1638762	4032.89	TRUE	famille	0.5	0	0	1	0	0	25	0	0	1	FALSE	FALSE	FALSE	TRUE	TRUE	free	diakore	161.316
89	23	5683.7	125	4	250000	78	259288	1630957	5673.59	FALSE	famille	0.5	29	0	2	0	0	74	4	0	2	FALSE	TRUE	FALSE	TRUE	TRUE	tsetse	diakore	72.7383
90	24	4103.75	100	3	192000	58	259287	1630815	3873.85	FALSE	employes	0	0	0	1	0	0	56	2	0	1	FALSE	TRUE	FALSE	TRUE	TRUE	tsetse	diakore	66.7904
91	8	630	100	2	175000	21	263111	1642005	993.472	FALSE	famille	4	0	0	1	0	0	21	0	0	2	FALSE	TRUE	FALSE	FALSE	TRUE	free	diakore	47.3082
92	13	498.462	150	2	250000	36	266028	1642559	1126.12	FALSE	employes	1	0	0	1	0	0	36	0	0	2	FALSE	FALSE	FALSE	TRUE	TRUE	free	diakore	31.2812
94	2	2860	0	0	0	4	259211	1634300	2087.8	FALSE	employes	12	0	0	1	2	0	0	4	11	4	FALSE	TRUE	FALSE	FALSE	TRUE	free	other	521.95
95	6	260	150	1	250000	11	266026	1642335	570.923	FALSE	famille	2	0	0	1	0	0	11	0	0	4	FALSE	TRUE	FALSE	FALSE	TRUE	free	diakore	51.9021
96	36	6422.5	135	15	200000	126	266026	1642248	9261.9	FALSE	famille	12	0	0	3	0	0	117	9	0	5	FALSE	TRUE	FALSE	TRUE	TRUE	free	diakore	73.5072
97	45	6810	150	10	250000	137	266026	1642394	8782.53	TRUE	famille	1.5	0	0	2	1	4	128	5	0	3	FALSE	TRUE	FALSE	TRUE	TRUE	free	diakore	64.1061
98	20	1620	150	4	250000	45	254598	1637854	2707.09	FALSE	employes	1.5	0	0	0	1	0	45	0	0	1	FALSE	FALSE	FALSE	TRUE	TRUE	free	diakore	60.1576
99	21	3200	140	5	240000	62	263113	1643088	4165.39	TRUE	famille	1	0	0	1	0	0	59	3	0	2	FALSE	TRUE	FALSE	TRUE	TRUE	free	diakore	67.1837
100	22	2004.55	120	5	200000	52	259677	1630993	2987.81	FALSE	famille	0	0	0	1	1	0	50	2	0	2	FALSE	TRUE	FALSE	TRUE	TRUE	tsetse	diakore	57.4579
101	3	945	150	1	250000	15	266025	1642313	1070.97	FALSE	famille	1.5	0	0	1	0	0	13	2	0	1	FALSE	TRUE	FALSE	FALSE	TRUE	free	diakore	71.3982
102	6	520	150	1	250000	19	266026	1642418	760.723	TRUE	employes	0	0	0	0	1	0	16	3	0	0	FALSE	TRUE	FALSE	FALSE	FALSE	free	diakore	40.0381
104	6	540	110	2	175000	24	263113	1641850	927.772	TRUE	famille	3	0	0	1	0	0	24	0	0	0	FALSE	FALSE	FALSE	TRUE	TRUE	free	diakore	38.6572
105	14	1902.86	135	3	130000	32	258847	1640355	1983.64	TRUE	famille	1	0	0	1	0	0	32	0	0	2	FALSE	FALSE	FALSE	TRUE	TRUE	free	diakore	61.9887
107	10	2562	145	3	215000	25	259288	1630906	2853.56	FALSE	famille	4	24	0	3	0	0	25	0	0	4	FALSE	TRUE	FALSE	FALSE	TRUE	tsetse	diakore	114.142
108	8	0	175	4	300000	19	266026	1642418	1829.39	FALSE	employes	25	0	0	1	0	0	2	17	0	2	FALSE	TRUE	FALSE	FALSE	TRUE	free	other	96.2837
109	13	1412.31	135	3	216000	28	254595	1637823	2018.86	TRUE	employes	0	0	0	1	0	0	28	0	0	1	FALSE	FALSE	FALSE	FALSE	TRUE	free	diakore	72.102
110	13	1332.69	150	3	250000	41	265761	1634667	2116.23	FALSE	famille	0	0	0	1	0	0	39	2	0	1	FALSE	TRUE	FALSE	FALSE	TRUE	tsetse	diakore	51.6155
112	17	2334.71	130	3	230000	43	259288	1630919	2756.24	TRUE	famille	0	0	0	1	0	0	41	2	0	2	FALSE	TRUE	FALSE	FALSE	TRUE	tsetse	diakore	64.0985
117	27	2255.56	125	4	225000	61	259288	1630935	3018.6	FALSE	famille	0	0	0	0	1	0	59	2	0	3	FALSE	TRUE	FALSE	FALSE	TRUE	tsetse	diakore	49.4852
119	10	864	100	2	125000	23	263113	1641894	1011.84	TRUE	famille	5	25	0	1	0	0	23	0	0	3	FALSE	FALSE	FALSE	FALSE	TRUE	free	diakore	43.9932
121	18	3410	140	3	233000	56	265293	1642311	3554.92	FALSE	employes	0	0	0	0	0	0	56	0	0	0	FALSE	FALSE	FALSE	FALSE	FALSE	free	diakore	63.4807
122	14	1967.14	145	4	225000	36	266026	1642241	2808.06	FALSE	famille	1.5	0	0	1	0	0	35	1	0	3	FALSE	TRUE	FALSE	FALSE	TRUE	free	diakore	78.0016
127	20	1947.75	120	4	220000	53	254588	1637844	2763.41	FALSE	famille	1	0	0	0	1	0	53	0	0	2	FALSE	FALSE	FALSE	TRUE	TRUE	free	diakore	52.1398
128	10	1092	70	2	112500	23	259287	1630878	1140.17	FALSE	famille	2	0	0	1	0	0	22	1	0	1	FALSE	TRUE	FALSE	TRUE	TRUE	tsetse	diakore	49.5726
130	9	1740	150	1	250000	15	258510	1640427	1651.32	FALSE	famille	1	0	0	1	0	0	15	0	0	3	FALSE	FALSE	FALSE	TRUE	TRUE	free	diakore	110.088
131	9	1010	150	1	250000	22	266173	1638695	1118.42	FALSE	famille	0	0	0	1	0	0	21	1	0	1	FALSE	TRUE	FALSE	FALSE	TRUE	free	diakore	50.8374
134	12	2565	130	1	105000	19	270111	1635336	2032.52	FALSE	famille	3	4	0	2	0	0	19	0	0	1	TRUE	TRUE	FALSE	FALSE	TRUE	free	diakore	106.975
135	14	2828.57	250	2	200000	35	269543	1648229	2674.65	TRUE	famille	2	80	0	0	1	0	0	4	0	4	FALSE	TRUE	FALSE	FALSE	TRUE	free	other	76.4187
136	7	1307.14	250	1	200000	24	278152	1638747	1259.11	FALSE	famille	1	44	0	1	0	0	24	0	0	3	FALSE	FALSE	FALSE	FALSE	TRUE	tsetse	diakore	52.463
137	3	360	0	0	0	5	278196	1638749	262.8	FALSE	famille	0	125	0	0	0	0	5	0	0	2	FALSE	FALSE	FALSE	FALSE	FALSE	tsetse	diakore	52.56
138	34	4860	0	0	0	64	277795	1639311	3547.8	FALSE	employes	5	10	10	2	1	0	64	0	0	4	FALSE	FALSE	FALSE	TRUE	TRUE	free	diakore	55.4344
139	3	300	0	0	0	6	270759	1647148	219	FALSE	famille	2	6	0	1	0	0	6	0	0	2	FALSE	TRUE	FALSE	FALSE	TRUE	tsetse	diakore	36.5
140	45	8800	120	15	125000	105	287232	1635711	9282.42	FALSE	famille	0	160	1	1	1	0	105	0	0	2	FALSE	FALSE	FALSE	FALSE	TRUE	free	diakore	88.404
142	8	798.75	0	0	0	20	270373	1646844	583.087	FALSE	famille	3	0	0	1	0	0	20	0	0	5	TRUE	FALSE	FALSE	TRUE	TRUE	free	diakore	29.1544
143	47	12638.3	300	4	250000	110	280417	1627203	10750.4	FALSE	famille	2	350	0	2	1	0	110	0	0	3	TRUE	FALSE	FALSE	TRUE	TRUE	free	diakore	97.7314
145	9	880	0	0	0	20	287587	1636170	642.4	FALSE	famille	1	43	0	0	1	0	20	0	0	2	FALSE	FALSE	FALSE	FALSE	TRUE	free	diakore	32.12
146	19	2036.84	0	0	0	35	269969	1643477	1486.89	FALSE	famille	2	20	8	1	0	0	35	0	0	3	FALSE	FALSE	FALSE	FALSE	TRUE	free	diakore	42.4827
147	19	1263.16	0	0	0	40	270065	1645133	922.105	FALSE	famille	2	60	0	1	0	0	40	0	0	8	FALSE	FALSE	FALSE	TRUE	TRUE	free	diakore	23.0526
148	29	7373.79	0	0	0	58	270635	1636882	5382.87	TRUE	famille	2.5	25	8	1	0	0	58	0	0	5	FALSE	FALSE	FALSE	FALSE	FALSE	free	diakore	92.8081
149	31	5153.23	300	6	180000	72	277797	1632934	5408.31	FALSE	famille	2	350	0	3	0	0	72	0	0	4	FALSE	FALSE	FALSE	TRUE	TRUE	tsetse	diakore	75.1154
150	33	12477.3	175	1	150000	77	284849	1636020	9337.08	FALSE	famille	0	150	0	0	0	0	77	0	0	3	FALSE	FALSE	FALSE	FALSE	FALSE	free	diakore	121.261
151	12	2940	0	0	0	29	287478	1636028	2146.2	FALSE	famille	0	66	0	0	1	0	29	0	0	2	FALSE	FALSE	FALSE	FALSE	TRUE	free	diakore	74.0069
152	21	3634.29	180	0	150000	38	287475	1635916	2653.03	FALSE	famille	0	45	0	0	0	0	38	0	0	0	FALSE	FALSE	FALSE	FALSE	FALSE	free	diakore	69.8165
154	26	1540.38	0	0	0	43	287361	1635724	1124.48	FALSE	famille	0	140	0	0	0	0	43	0	0	1	FALSE	FALSE	FALSE	FALSE	FALSE	free	diakore	26.1507
155	53	7361.32	250	2	230000	108	287505	1635743	6075.03	TRUE	famille	0	140	0	0	0	0	108	0	0	4	FALSE	FALSE	FALSE	FALSE	TRUE	free	diakore	56.2503
156	19	2889.47	150	8	125000	40	275736	1640759	3633.81	FALSE	famille	0	90	0	1	0	0	40	0	0	4	FALSE	FALSE	FALSE	FALSE	TRUE	free	diakore	90.8452
158	13	5040	0	0	0	25	272981	1646148	3679.2	TRUE	famille	0.5	21	0	0	0	0	25	0	0	1	FALSE	FALSE	FALSE	FALSE	FALSE	free	diakore	147.168
159	20	5740	250	5	200000	35	287524	1635931	5714.69	FALSE	famille	0.5	47	0	0	0	0	35	0	0	2	FALSE	FALSE	FALSE	FALSE	TRUE	free	diakore	163.277
160	19	5371.58	0	0	0	37	271900	1643300	3921.25	FALSE	famille	1.25	75	4	2	0	0	36	1	0	2	TRUE	TRUE	FALSE	FALSE	TRUE	free	diakore	105.98
161	36	5355	190	1	180000	67	278127	1638745	4183.56	FALSE	famille	0.75	33	0	1	1	0	67	0	0	2	FALSE	FALSE	FALSE	FALSE	TRUE	tsetse	diakore	62.4412
162	27	12960	0	0	0	67	272038	1633350	9460.8	TRUE	famille	5	3	1	0	1	0	67	0	0	2	FALSE	FALSE	FALSE	FALSE	TRUE	free	diakore	141.206
163	22	9023.64	250	8	200000	52	287475	1635916	9026.44	FALSE	famille	0	45	0	0	1	0	52	0	0	2	FALSE	FALSE	FALSE	FALSE	TRUE	free	diakore	173.585
166	20	6300	0	0	0	38	280237	1641342	4599	FALSE	famille	5.5	10	9	1	1	0	0	38	0	2	TRUE	FALSE	FALSE	FALSE	TRUE	free	other	121.026
167	19	1485	0	0	0	47	275043	1647792	1084.05	FALSE	famille	7	40	0	0	0	0	47	0	0	4	FALSE	FALSE	FALSE	FALSE	FALSE	free	diakore	23.0649
168	22	6872.73	350	3	300000	43	280176	1641370	6389.13	FALSE	famille	5	5	2	3	0	0	43	0	0	7	TRUE	FALSE	FALSE	FALSE	TRUE	free	diakore	148.585
169	9	1080	250	2	200000	20	274015	1634076	1398.2	FALSE	famille	6	0	15	0	2	0	20	0	0	1	FALSE	FALSE	FALSE	FALSE	TRUE	tsetse	diakore	69.9098
170	93	27871	250	15	200000	187	284848	1633019	24919.3	FALSE	famille	0	16	9	1	1	0	187	0	0	7	FALSE	FALSE	FALSE	FALSE	TRUE	free	diakore	133.258
171	3	1333.33	200	1	280000	9	244986	1636189	1400.19	FALSE	employes	0	16	16	0	1	0	0	9	0	0	FALSE	TRUE	FALSE	FALSE	FALSE	free	other	155.577
172	5	1040	200	2	300000	12	245347	1636123	1673.9	FALSE	employes	0	0	8	0	0	0	0	12	0	0	FALSE	TRUE	FALSE	FALSE	FALSE	free	other	139.491
173	1	0	140	3	200000	5	242566	1634271	914.695	TRUE	famille	2	0	24	0	1	4	0	1	0	0	FALSE	TRUE	FALSE	TRUE	TRUE	free	gobra	182.939
175	11	1296	250	1	300000	18	293149	1639133	1403.43	FALSE	famille	0	4	0	1	0	18	0	0	0	0	FALSE	FALSE	FALSE	FALSE	TRUE	free	gobra	77.9682
176	12	720	200	5	300000	17	294261	1637326	2812.34	FALSE	famille	2	0	0	1	0	17	0	0	2	0	FALSE	FALSE	FALSE	FALSE	TRUE	free	gobra	165.432
177	10	1392	250	110	450000	21	294261	1637326	76478.5	FALSE	famille	0	5	5	1	0	17	0	4	0	2	FALSE	FALSE	FALSE	FALSE	TRUE	free	gobra	3641.84
178	10	600	200	10	400000	14	294261	1637326	6535.97	FALSE	famille	0	0	6	0	0	14	0	0	0	0	FALSE	FALSE	FALSE	FALSE	FALSE	free	gobra	466.855
179	30	2610	180	20	250000	50	293149	1639133	9527.76	FALSE	famille	0	30	15	2	1	50	0	0	0	0	FALSE	FALSE	FALSE	FALSE	TRUE	free	gobra	190.555
180	11	240	200	3	400000	20	293149	1639133	2004.59	FALSE	famille	0	12	0	0	0	20	0	0	0	0	FALSE	FALSE	FALSE	FALSE	FALSE	free	gobra	100.23
181	30	2960	200	4	250000	46	293149	1639133	3685.29	FALSE	famille	2	15	0	1	1	46	0	0	2	0	FALSE	FALSE	FALSE	FALSE	TRUE	free	gobra	80.1151
182	30	1782	200	10	250000	54	293149	1639133	5112.09	FALSE	famille	0	20	0	0	0	54	0	0	0	1	FALSE	FALSE	FALSE	FALSE	FALSE	free	gobra	94.6684
183	6	423.333	200	5	300000	10	293149	1639133	2595.77	FALSE	famille	3	0	0	0	0	10	0	0	3	0	FALSE	FALSE	FALSE	FALSE	FALSE	free	gobra	259.577
184	30	2448	200	5	300000	54	293149	1639133	4073.78	FALSE	famille	0	30	3	3	1	54	0	0	0	0	FALSE	FALSE	FALSE	FALSE	TRUE	free	gobra	75.4403
185	40	6120	300	55	400000	68	287475	1635916	38006.4	FALSE	famille	0	80	0	0	0	68	0	0	0	0	FALSE	FALSE	FALSE	FALSE	TRUE	free	gobra	558.918
186	25	570	200	15	250000	36	293149	1639133	6132.95	FALSE	famille	30	40	0	1	0	36	0	0	30	3	FALSE	FALSE	FALSE	FALSE	TRUE	free	gobra	170.36
187	23	3294.09	300	60	400000	37	287475	1635916	38992.5	FALSE	famille	0	70	0	4	0	37	0	0	0	0	FALSE	FALSE	FALSE	FALSE	TRUE	free	gobra	1053.85
188	10	360	200	20	350000	26	287475	1635916	10934.2	FALSE	famille	0	20	0	0	1	20	0	6	0	0	FALSE	FALSE	FALSE	FALSE	TRUE	free	gobra	420.548
189	13	1500	300	3	400000	23	296800	1638100	2924.39	TRUE	employes	12.5	5	10	1	3	23	0	0	0	0	TRUE	FALSE	FALSE	FALSE	TRUE	free	gobra	127.147
190	16	2835	200	0	250000	26	296800	1638100	2069.55	TRUE	employes	9	0	0	1	1	26	0	0	0	0	TRUE	FALSE	FALSE	FALSE	TRUE	free	gobra	79.5981
191	4	924	200	5	300000	16	296979	1634191	2961.26	FALSE	employes	10	0	10	1	2	15	0	1	0	0	TRUE	TRUE	FALSE	FALSE	TRUE	free	gobra	185.079
192	18	2400	250	0	300000	27	294439	1640400	1752	FALSE	famille	0	10	7	1	0	27	0	0	0	0	FALSE	FALSE	FALSE	FALSE	FALSE	free	gobra	64.8889
193	23	2592	250	2	400000	37	294441	1640319	3111.75	FALSE	famille	0	0	0	0	0	37	0	0	0	0	FALSE	TRUE	FALSE	FALSE	TRUE	free	gobra	84.1015
195	70	4961.57	200	5	500000	97	294441	1640319	7433.18	TRUE	famille	2	50	15	0	0	97	0	0	0	0	FALSE	TRUE	FALSE	FALSE	TRUE	free	gobra	76.6307
196	8	600	200	0	300000	12	294572	1633046	438	FALSE	employes	0	0	4	0	1	12	0	0	0	0	FALSE	FALSE	FALSE	FALSE	TRUE	free	gobra	36.5
197	11	1861.36	200	12	350000	19	294518	1633185	7761.66	FALSE	employes	2	0	3	0	2	19	0	0	0	0	TRUE	FALSE	FALSE	FALSE	TRUE	free	gobra	408.509
198	3	900	250	4	300000	6	294572	1633046	2486.39	FALSE	employes	5	0	12	0	2	6	0	0	0	0	TRUE	FALSE	FALSE	FALSE	TRUE	free	gobra	414.398
199	14	1800	200	6	300000	19	295095	1637236	4058.09	FALSE	famille	0	20	0	2	0	19	0	0	0	0	FALSE	FALSE	FALSE	FALSE	TRUE	free	gobra	213.583
200	10	2100	200	5	300000	25	295093	1637236	3819.74	FALSE	famille	0	2	1	0	0	25	0	0	0	0	FALSE	FALSE	FALSE	FALSE	FALSE	free	gobra	152.79
201	10	1500	200	0	250000	16	294441	1640319	1095	FALSE	famille	0	5	0	0	1	16	0	0	0	0	FALSE	FALSE	FALSE	FALSE	TRUE	free	gobra	68.4375
202	12	1160	0	0	0	18	296700	1633000	846.8	FALSE	famille	0	15	0	0	0	18	0	0	0	0	FALSE	FALSE	FALSE	FALSE	FALSE	free	gobra	47.0444
203	6	600	0	0	0	8	296700	1633000	438	FALSE	famille	0	0	0	0	2	8	0	0	0	0	FALSE	FALSE	FALSE	FALSE	FALSE	free	gobra	54.75
204	20	900	250	5	300000	25	296700	1633000	2943.74	FALSE	famille	0	5	0	0	0	25	0	0	0	0	FALSE	FALSE	FALSE	FALSE	FALSE	free	gobra	117.75
205	14	1830	200	4	300000	22	296700	1633000	3165.29	FALSE	famille	0	0	0	0	1	22	0	0	0	0	FALSE	FALSE	FALSE	FALSE	FALSE	free	gobra	143.877
206	10	1200	200	4	250000	20	295095	1637236	2400.49	FALSE	famille	0	0	0	0	3	20	0	0	0	0	FALSE	FALSE	FALSE	FALSE	FALSE	free	gobra	120.025
207	15	2100	200	4	300000	32	296800	1638100	3362.39	FALSE	famille	0	0	0	0	0	32	0	0	0	0	FALSE	FALSE	FALSE	FALSE	TRUE	free	gobra	105.075
210	9	1644	250	4	300000	20	294441	1640319	3029.51	FALSE	famille	0	18	0	0	0	20	0	0	0	0	FALSE	FALSE	FALSE	FALSE	FALSE	free	gobra	151.476
211	14	1080	200	4	250000	18	294572	1633046	2312.89	FALSE	famille	0	0	0	0	0	18	0	0	0	0	FALSE	FALSE	FALSE	FALSE	FALSE	free	gobra	128.494
213	15	1500	200	4	300000	22	296800	1638100	2924.39	FALSE	famille	0	0	0	0	0	22	0	0	0	0	FALSE	FALSE	FALSE	FALSE	FALSE	free	gobra	132.927
214	18	2160	250	6	300000	26	296800	1638100	4320.89	FALSE	famille	0	0	0	0	1	0	26	0	0	0	FALSE	FALSE	FALSE	FALSE	TRUE	free	diakore	166.188
215	110	1800	250	6	300000	21	287475	1635916	4058.09	FALSE	famille	0	16	0	0	0	21	0	0	0	0	FALSE	FALSE	FALSE	FALSE	FALSE	free	gobra	193.242
217	76	14191.6	100	4	200000	128	251315	1631539	11579.4	FALSE	famille	0	30	6	1	0	0	128	0	0	2	FALSE	FALSE	FALSE	FALSE	FALSE	free	diakore	90.4644
220	24	4940	150	5	200000	50	251364	1631495	5130.69	TRUE	famille	0	0	0	0	0	50	0	0	0	5	FALSE	FALSE	FALSE	FALSE	FALSE	free	gobra	102.614
221	23	5006.25	100	3	90000	49	251163	1631630	4066.18	FALSE	famille	0	0	9	1	0	3	44	2	0	1	FALSE	TRUE	FALSE	FALSE	FALSE	free	diakore	82.9832
270	94	117585	400	20	250000	130	256754	1636236	93459.7	FALSE	employes	35	0	50	1	0	10	0	120	10	3	TRUE	TRUE	TRUE	TRUE	TRUE	free	other	718.921
273	19	5049.47	150	2	250000	39	266026	1642223	4448.36	FALSE	famille	0.5	0	0	1	0	0	39	0	0	2	FALSE	FALSE	FALSE	FALSE	TRUE	free	diakore	114.061
274	35	5682.86	160	7	242800	85	266026	1642259	6739.51	FALSE	famille	2	0	0	1	0	2	79	4	0	3	FALSE	TRUE	FALSE	TRUE	TRUE	free	diakore	79.2884
275	66	3130.91	160	11	185000	127	266049	1624835	5387.91	FALSE	famille	3	77	0	2	0	0	125	2	0	3	TRUE	TRUE	FALSE	TRUE	TRUE	free	diakore	42.4245
276	35	2544	100	5	160000	92	270115	1621296	3076.71	FALSE	famille	9	47	0	0	0	0	92	0	0	3	FALSE	FALSE	FALSE	TRUE	TRUE	free	diakore	33.4425
277	34	1821.31	175	8	175000	67	266711	1628080	3463.84	FALSE	employes	0	27	0	0	1	0	67	0	0	0	FALSE	TRUE	FALSE	FALSE	TRUE	free	diakore	51.6992
278	7	612.857	150	5	180000	23	267280	1631760	1819.43	TRUE	famille	2.5	26	0	1	0	0	22	1	0	1	TRUE	TRUE	FALSE	TRUE	TRUE	tsetse	diakore	79.1056
279	10	689.5	0	0	0	25	264218	1621289	503.335	FALSE	employes	0	5	49	0	1	0	21	4	0	2	FALSE	TRUE	TRUE	TRUE	TRUE	free	diakore	20.1334
